# Supplementary material
Source: bioRxiv or medRxiv preprint supplement (https://medrxiv.org/highwire/filestream/74590/field_highwire_adjunct_files/1/2020.03.27.20045534-2.pdf)

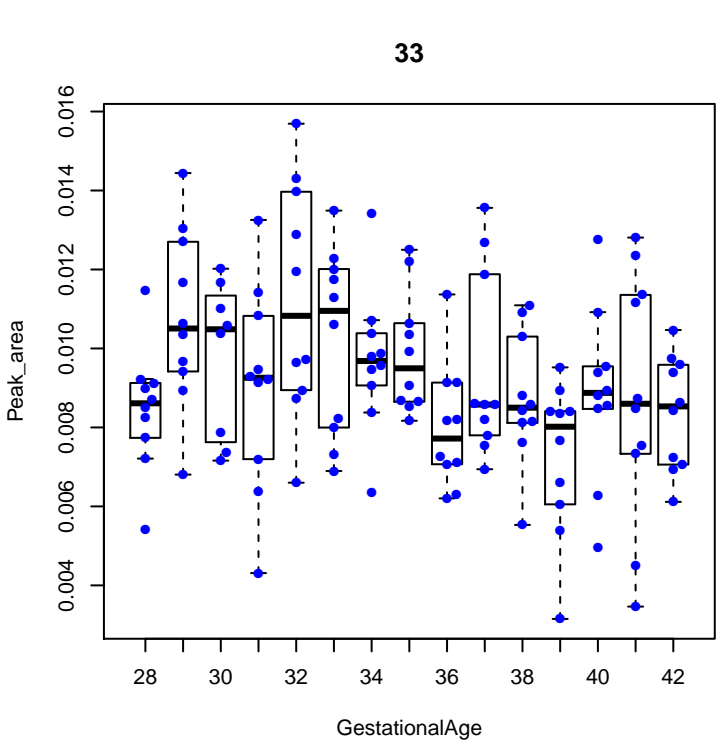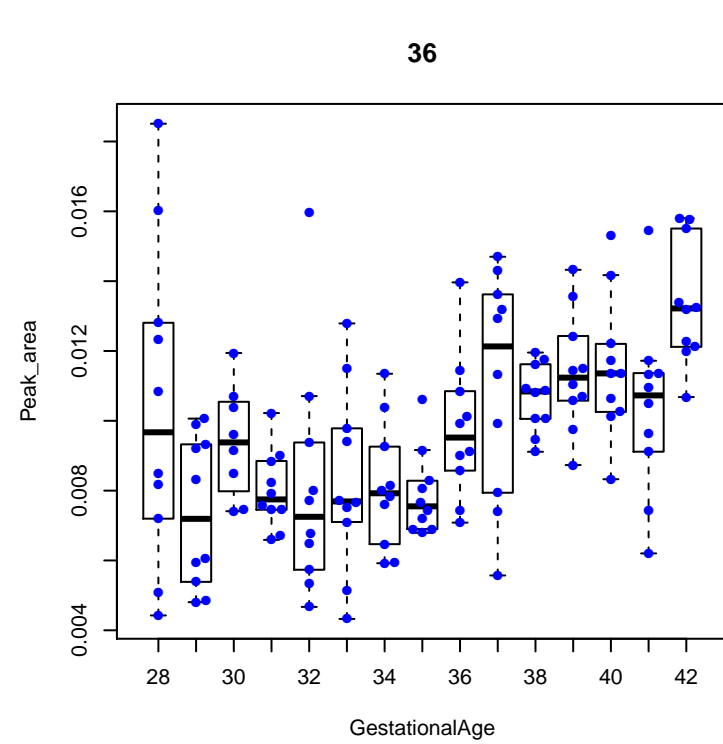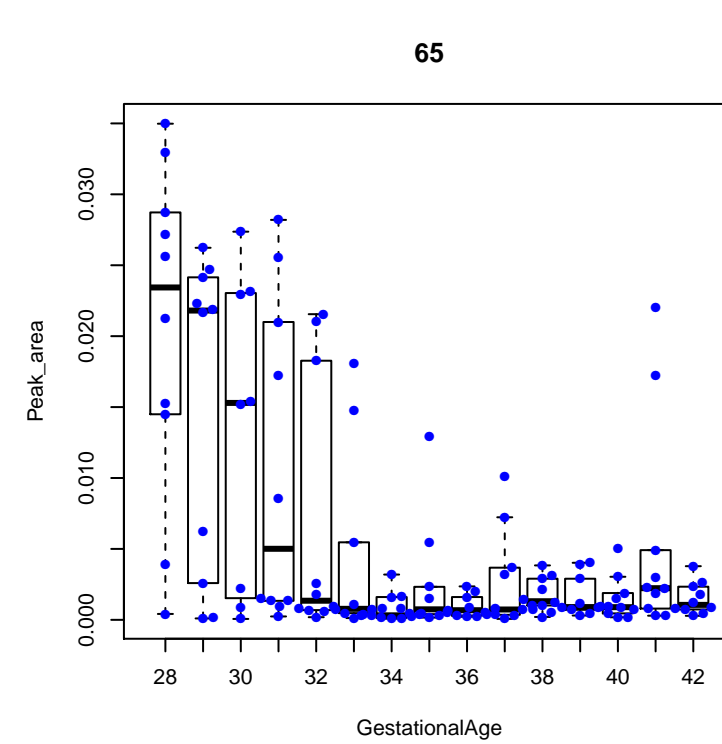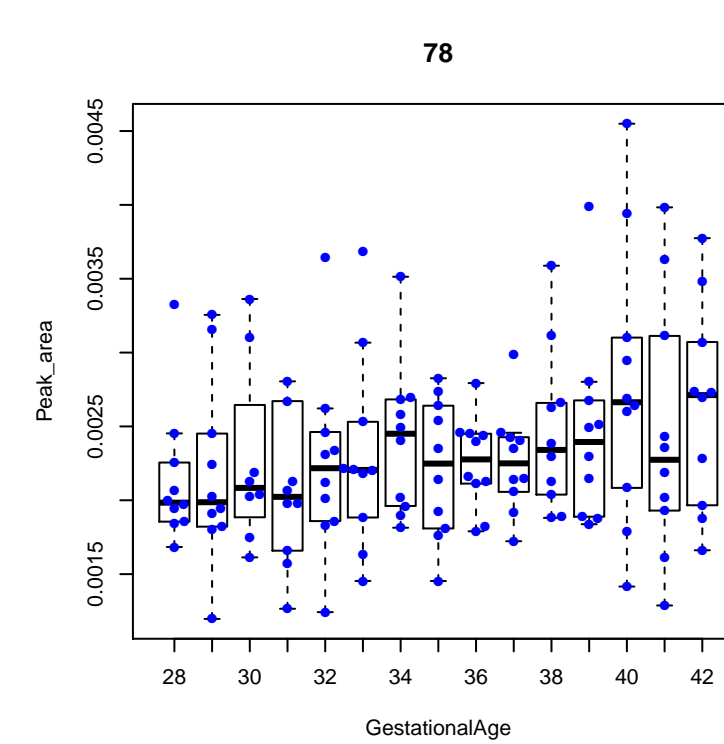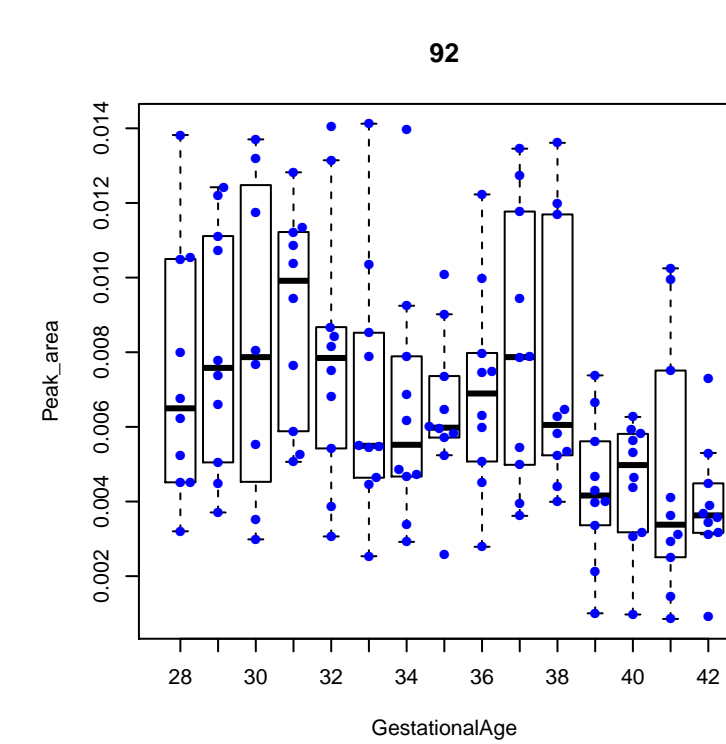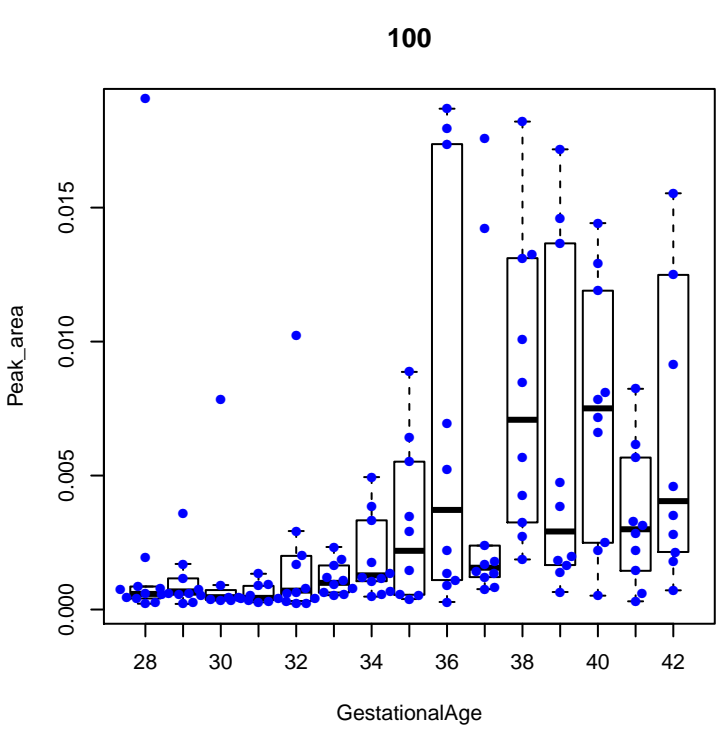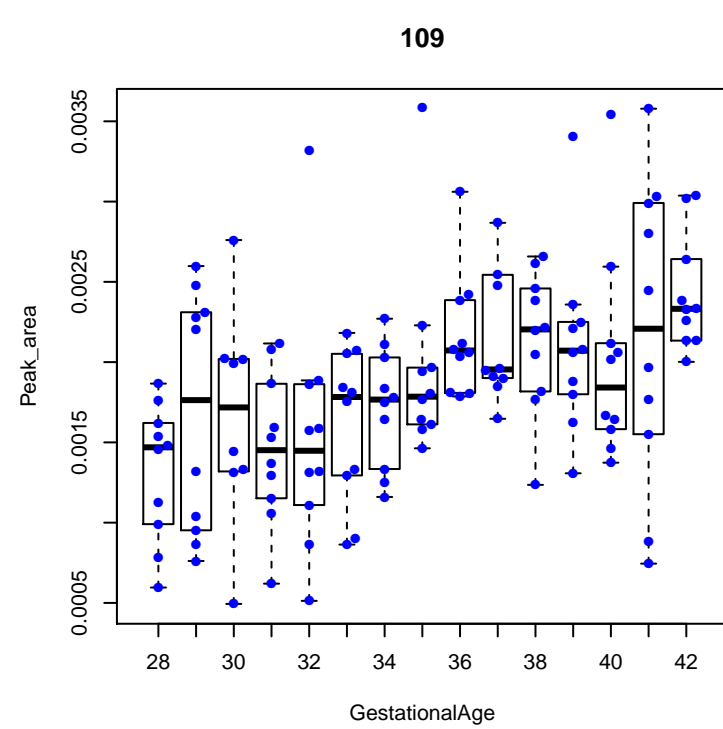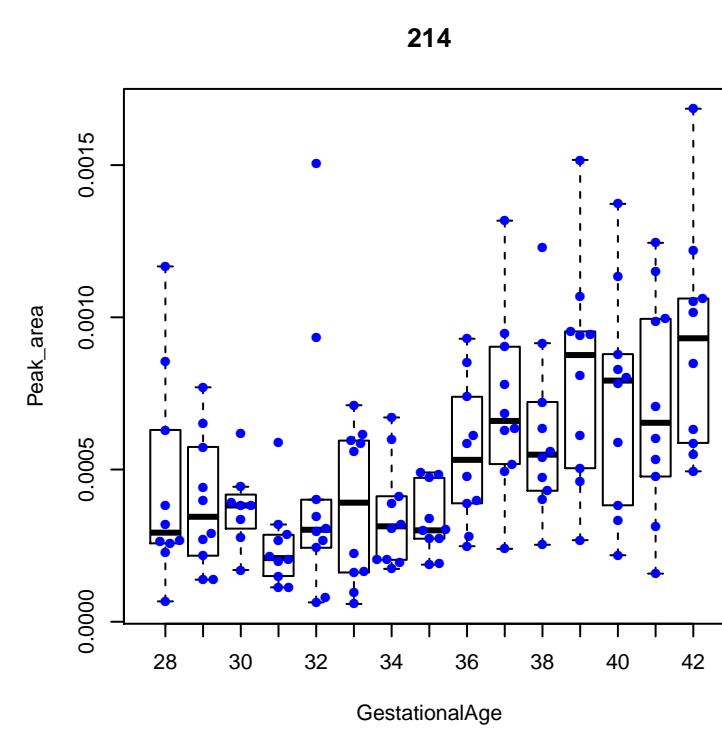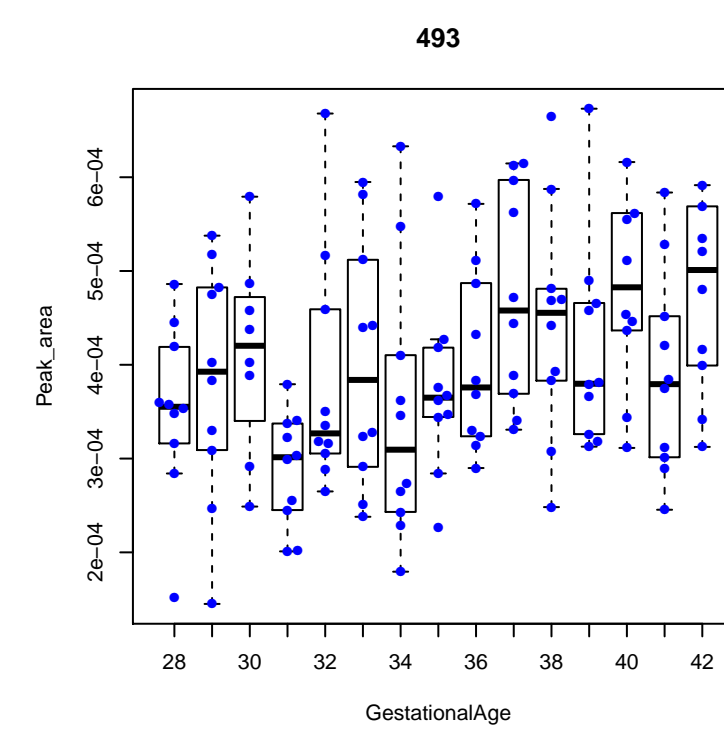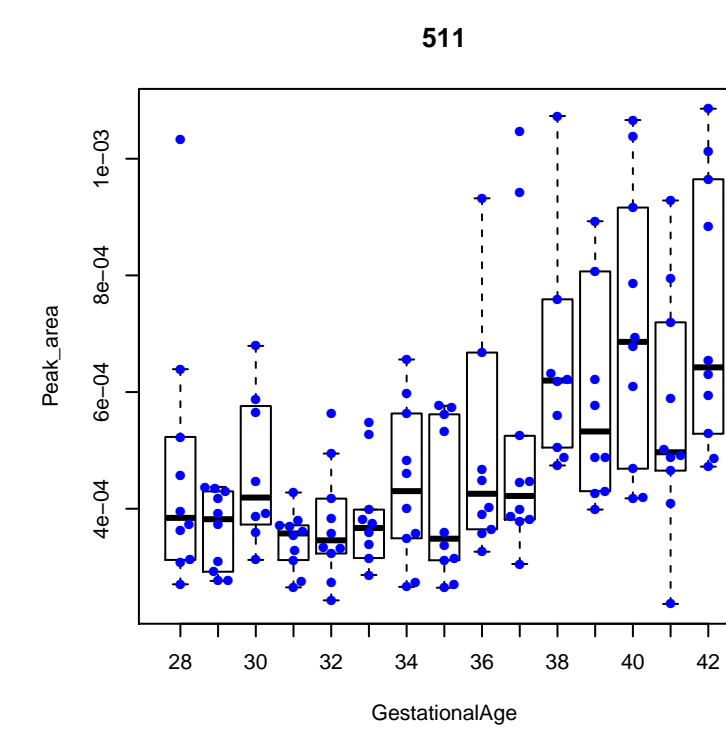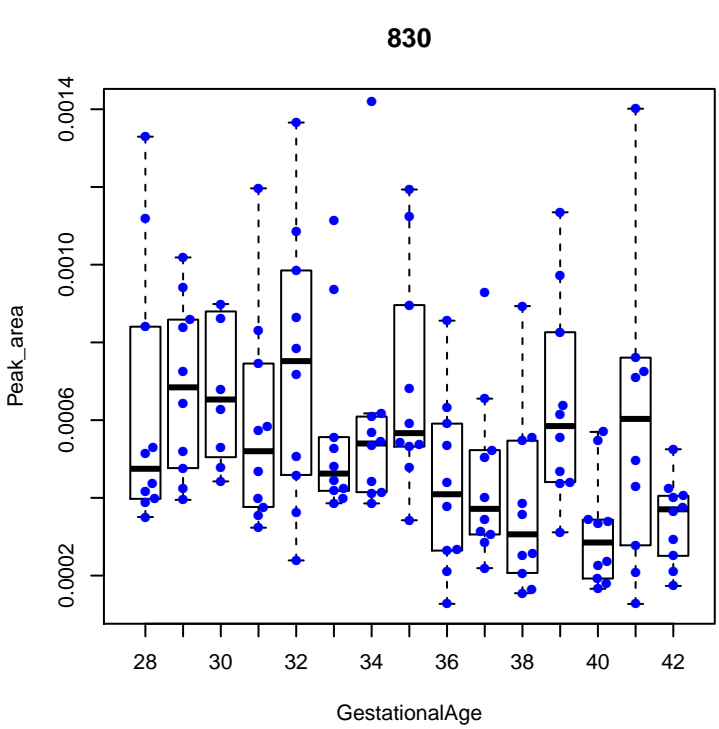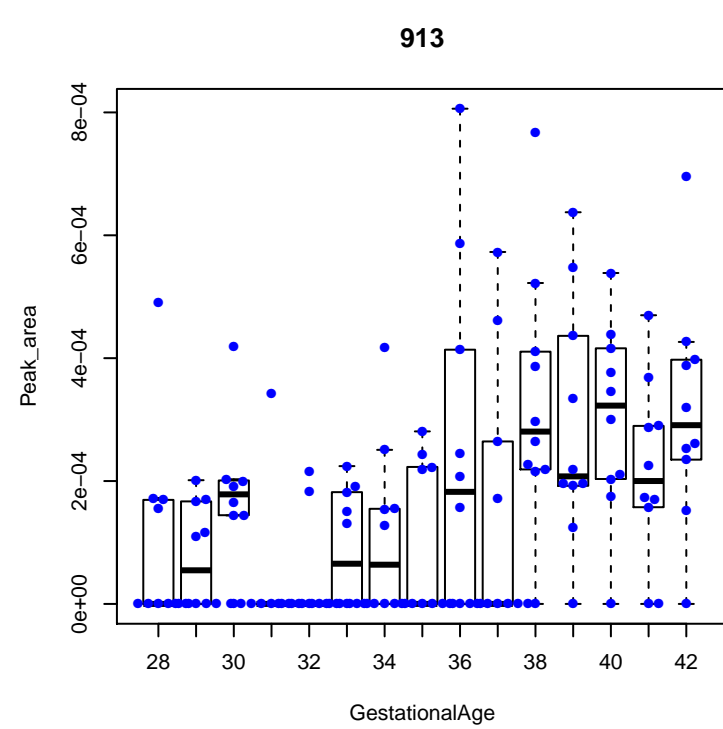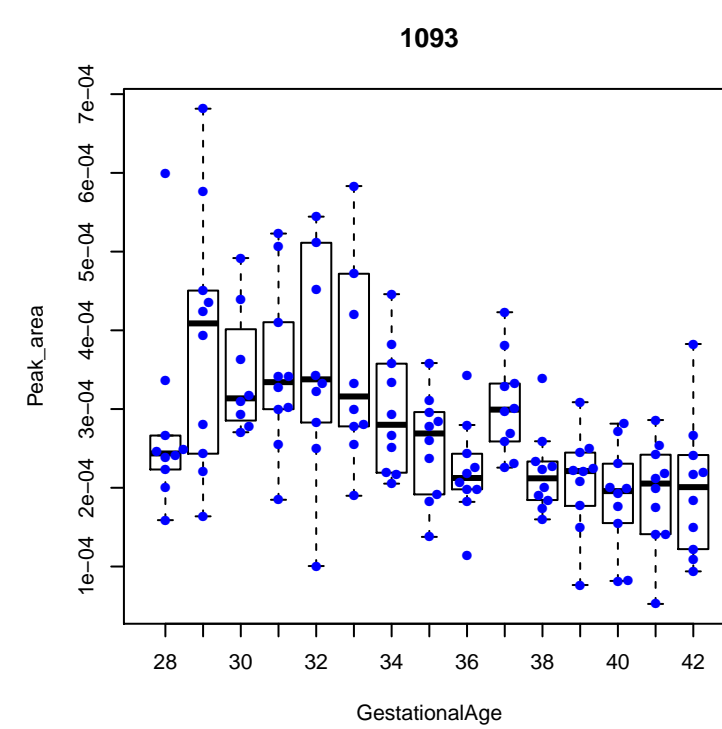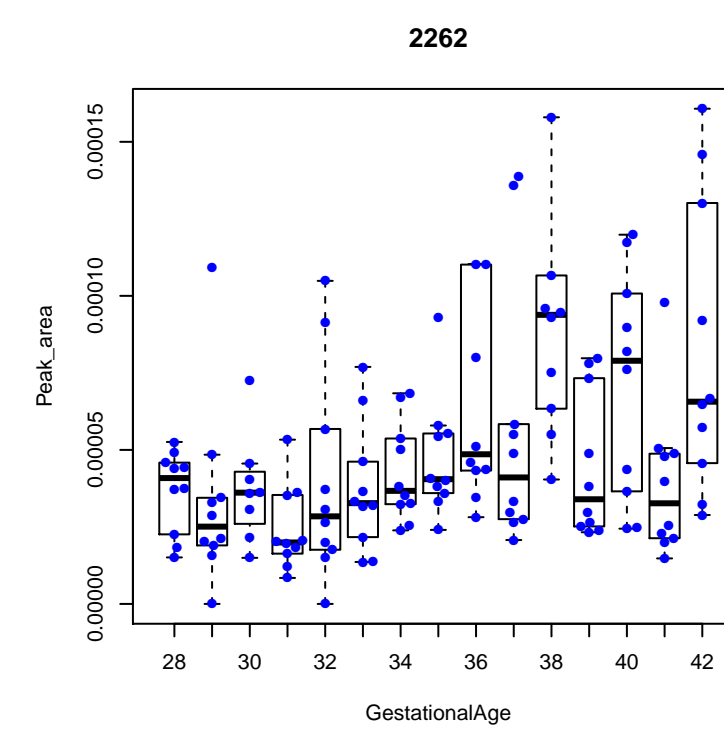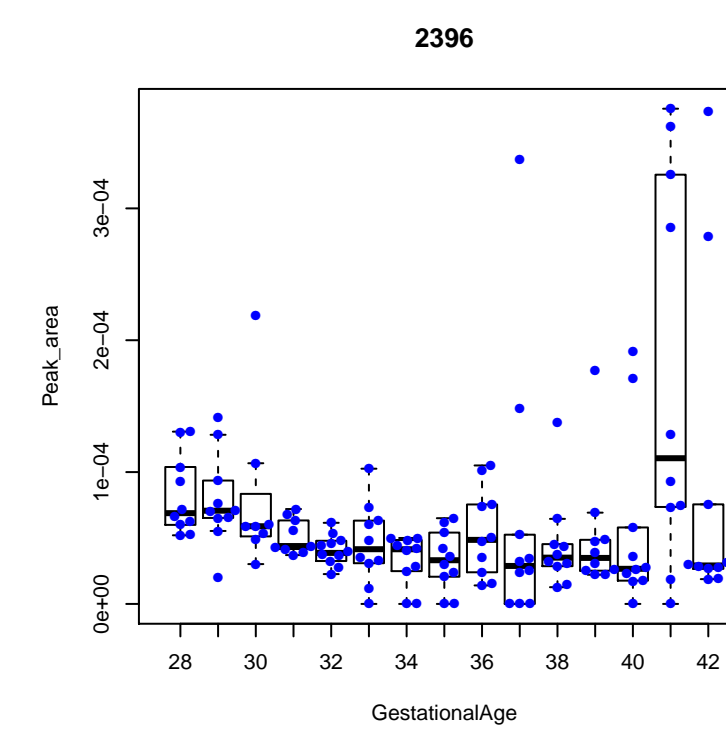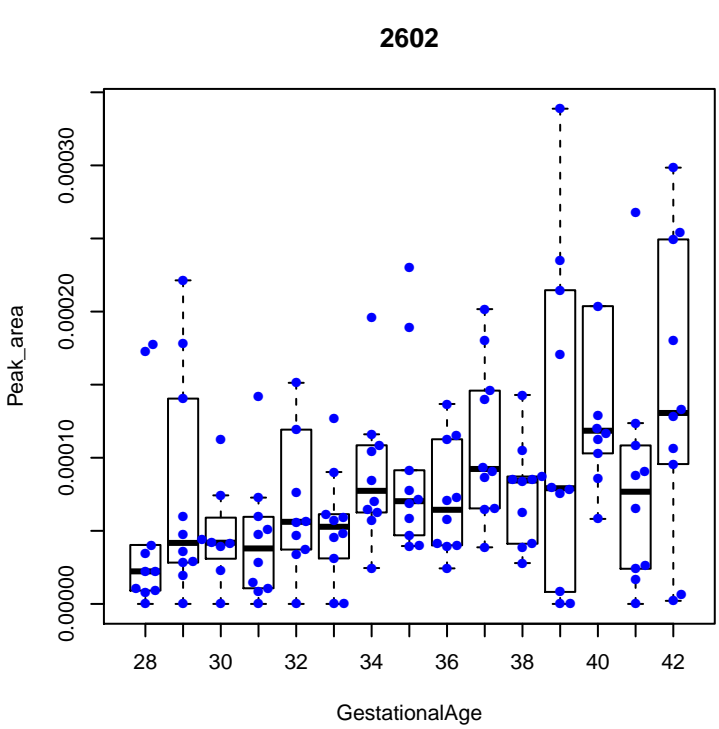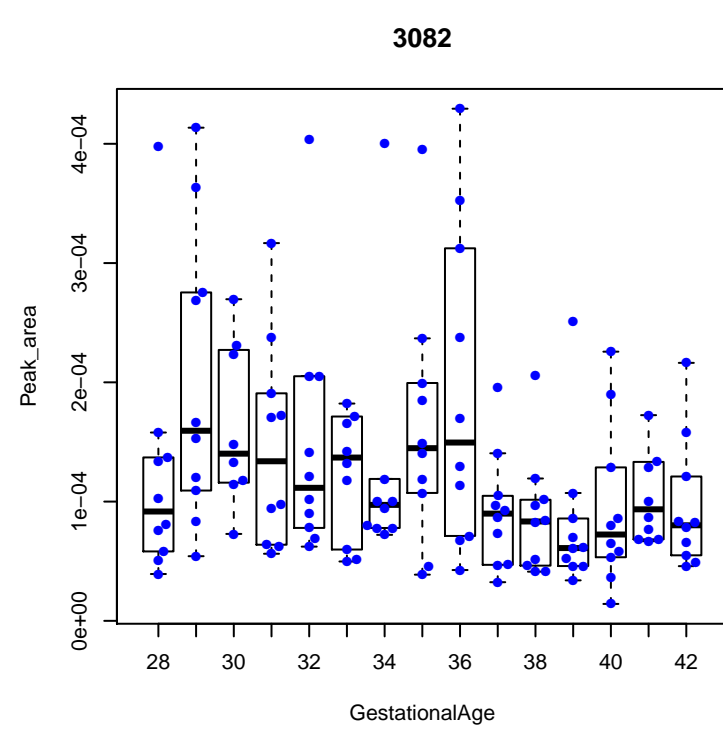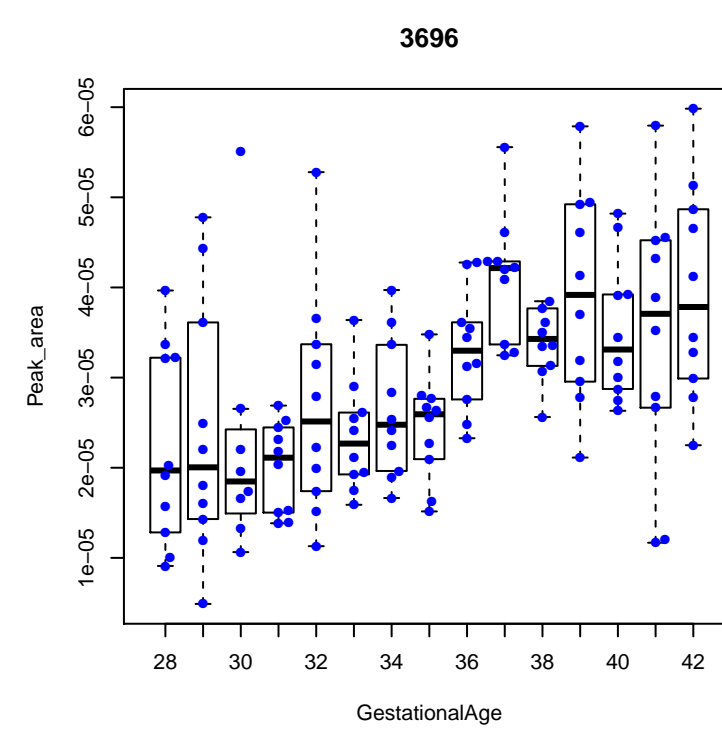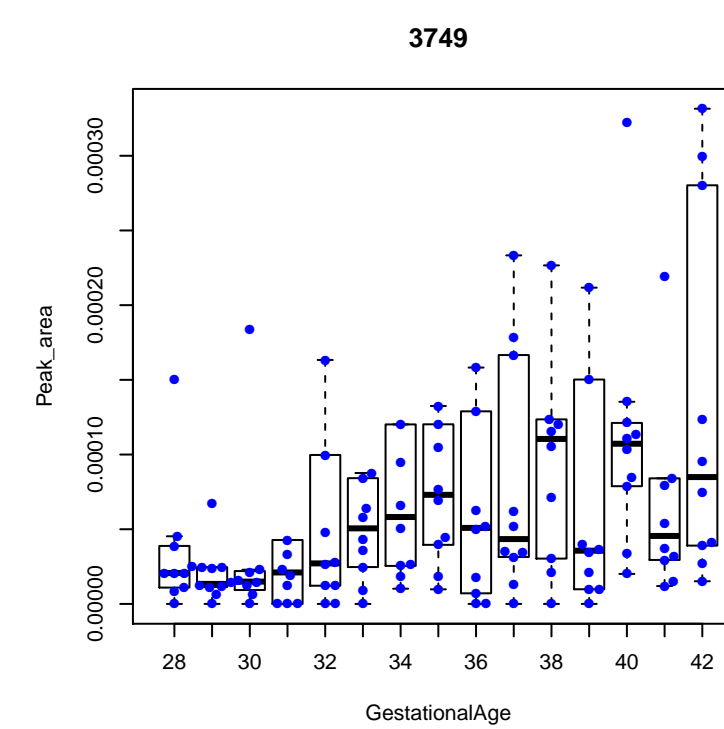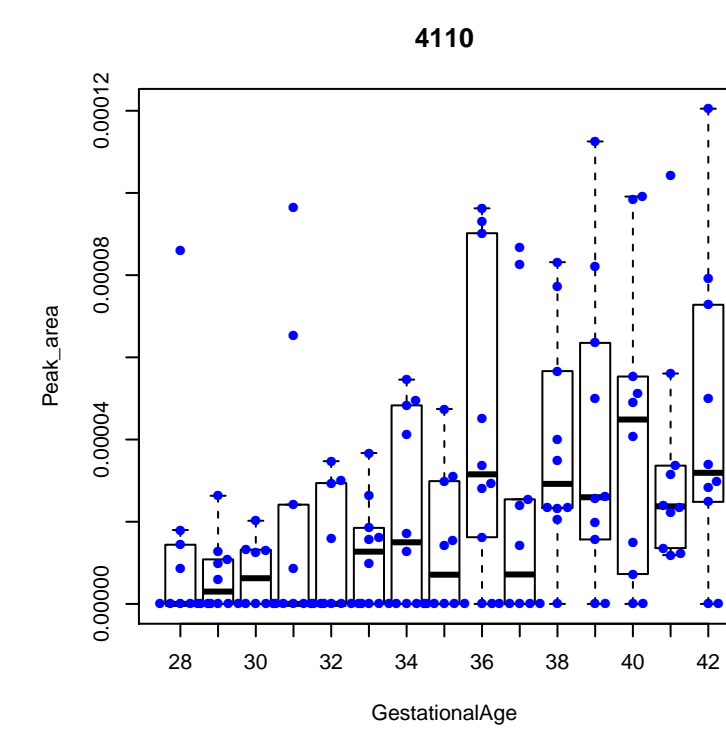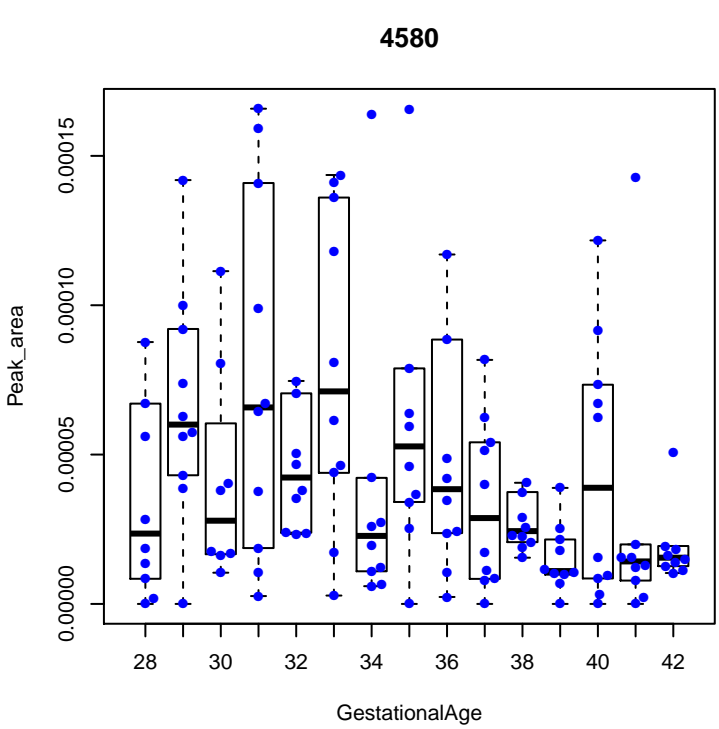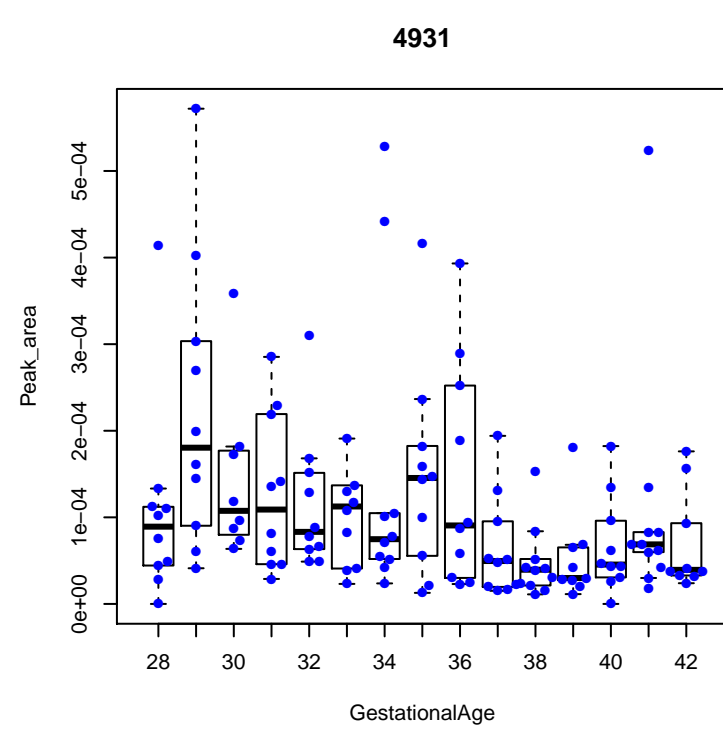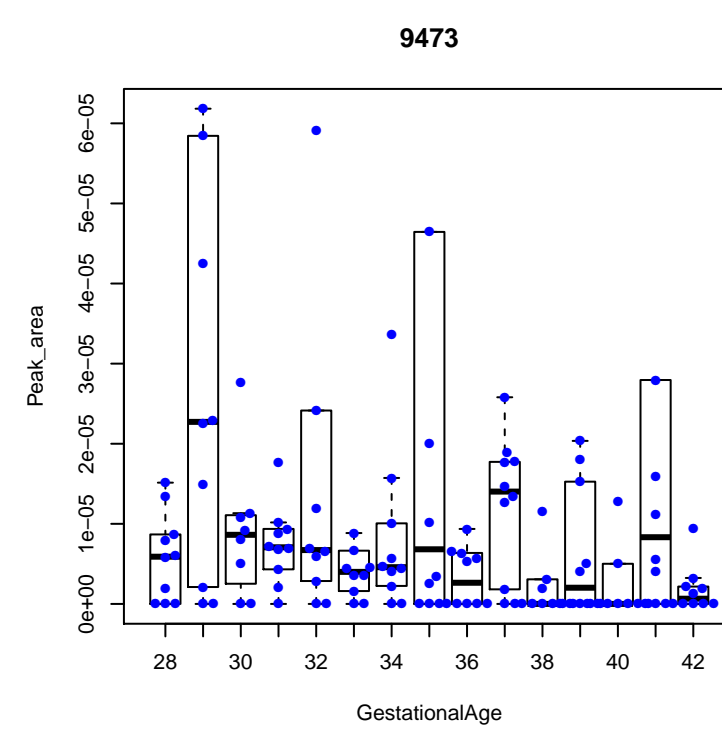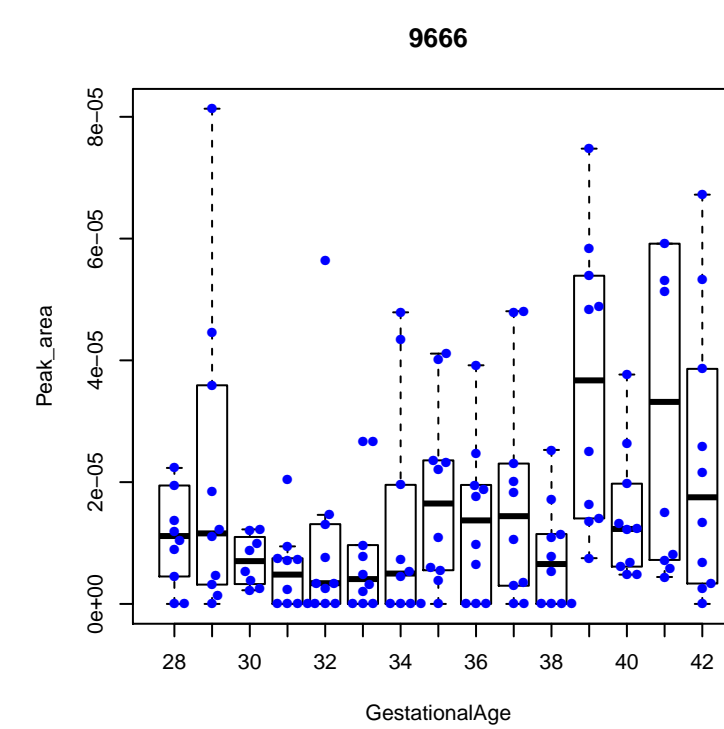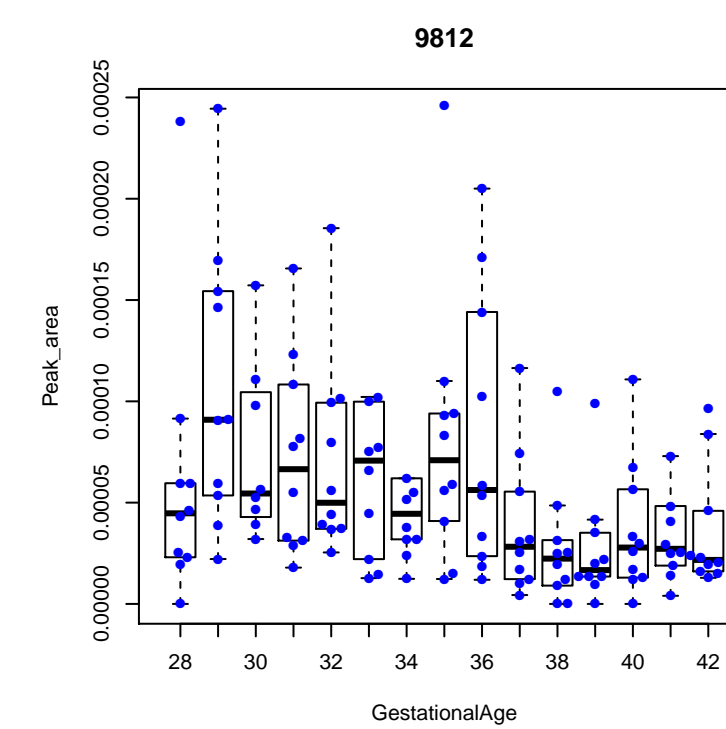

9848

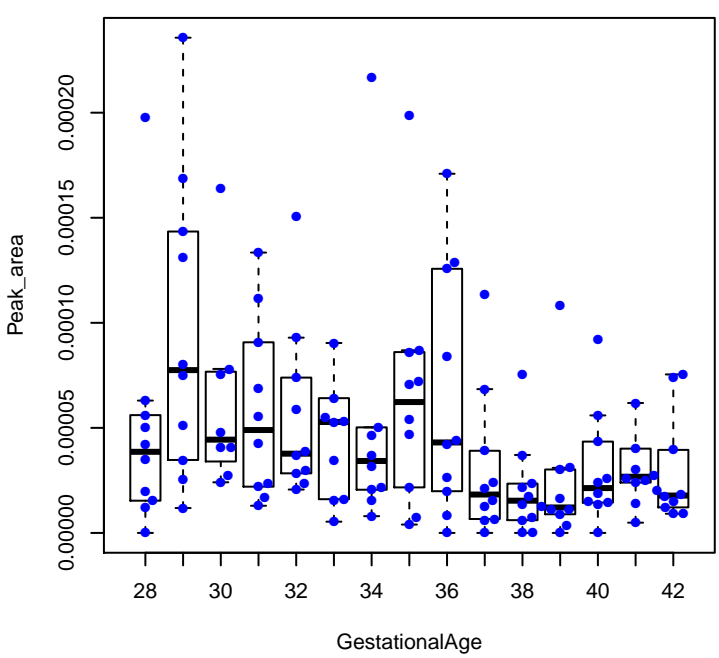

10001

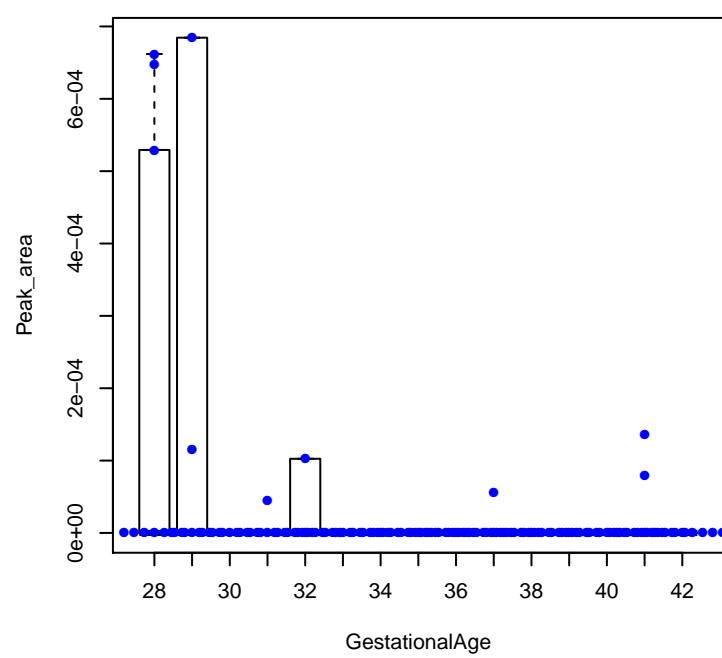

10635

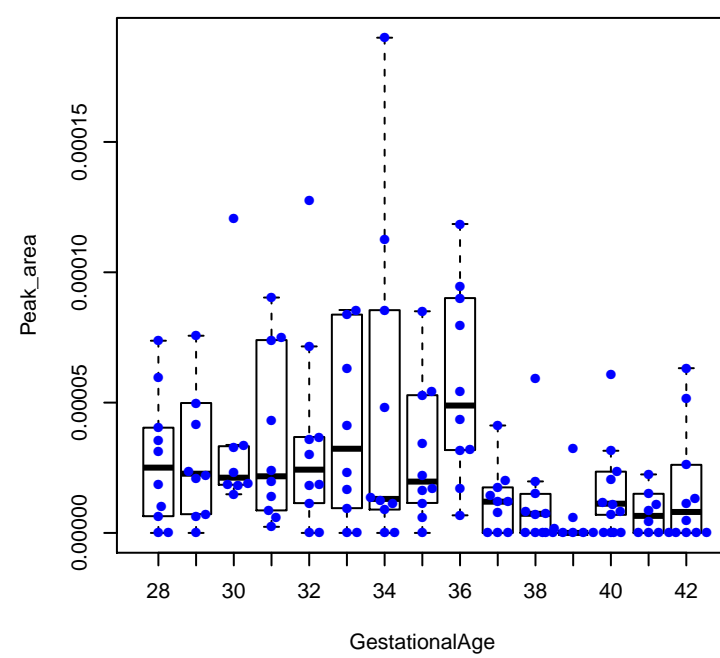

10897

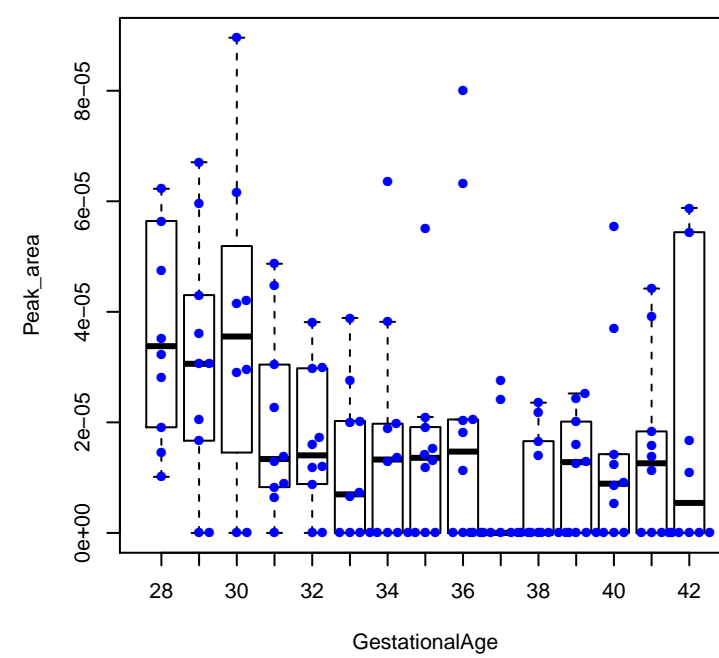

11066

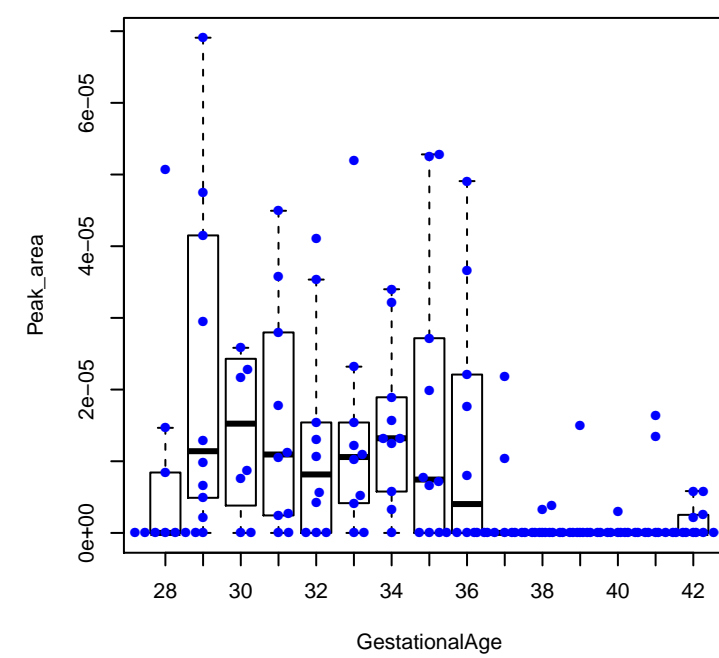

12284

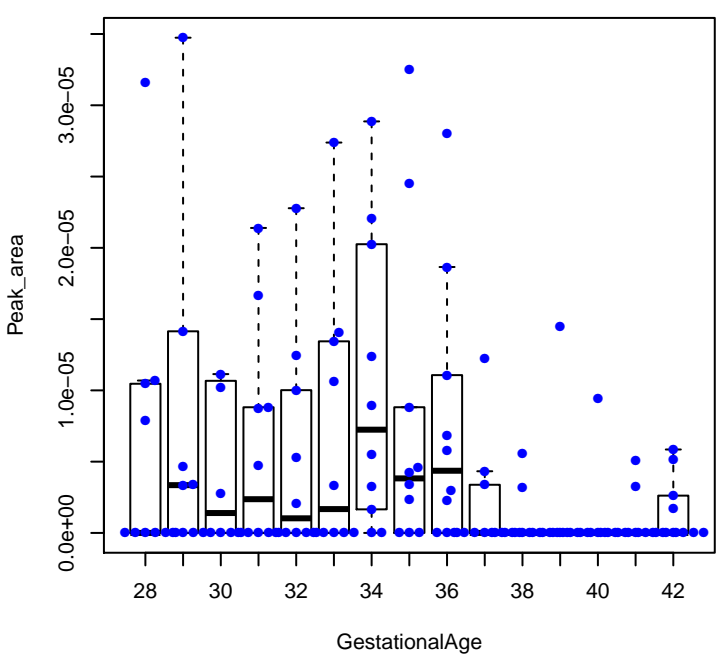

13729

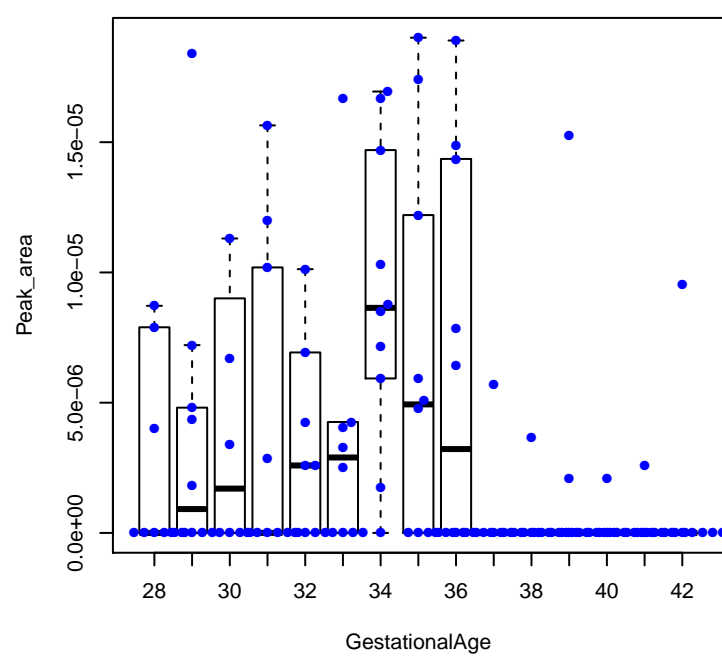

14019

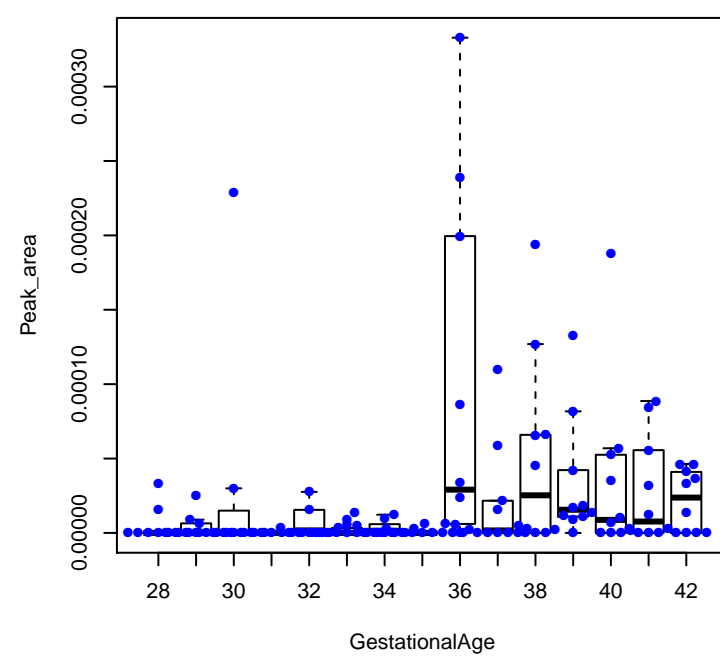

14969

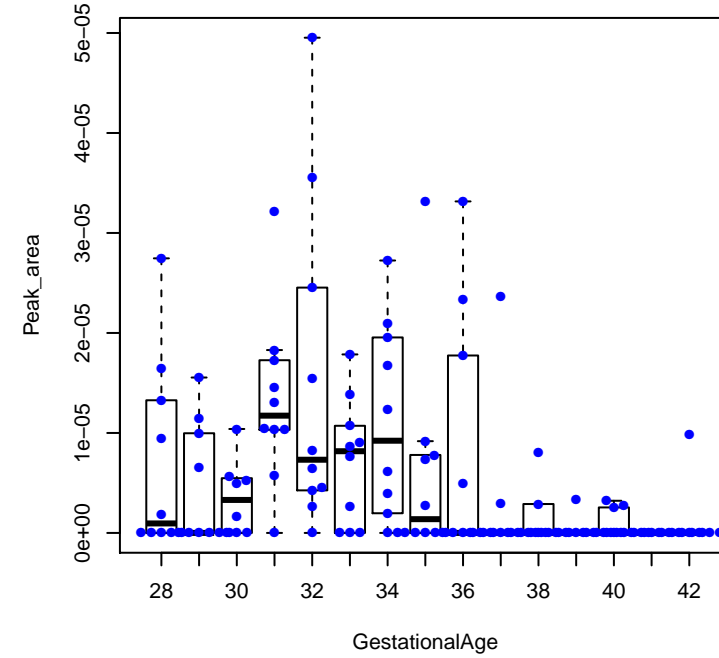

16983

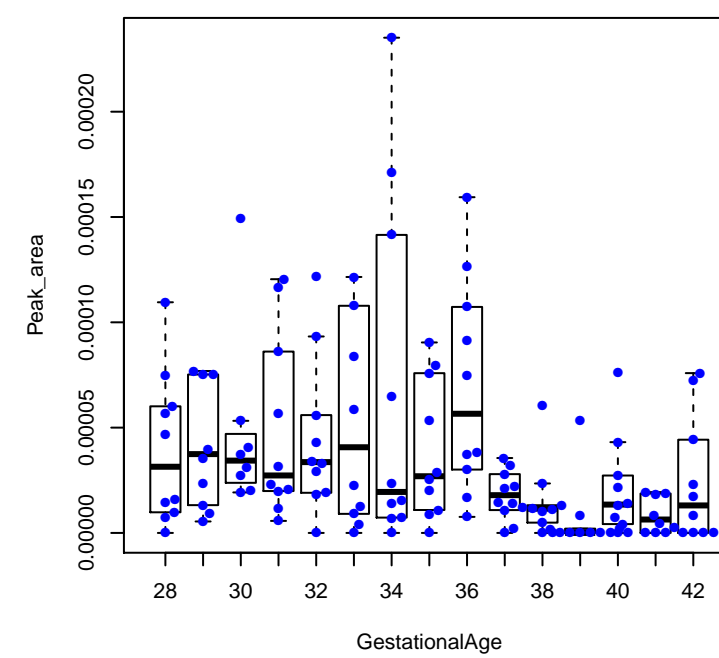

17174

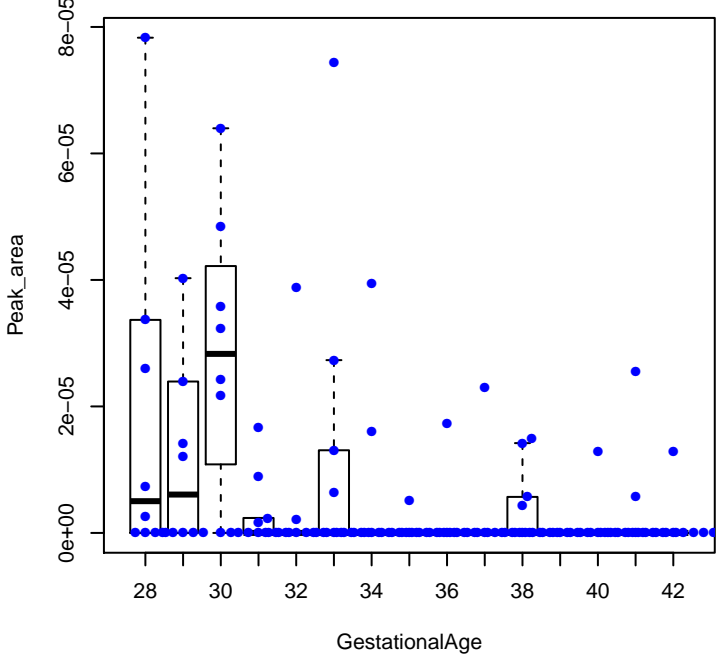

19209

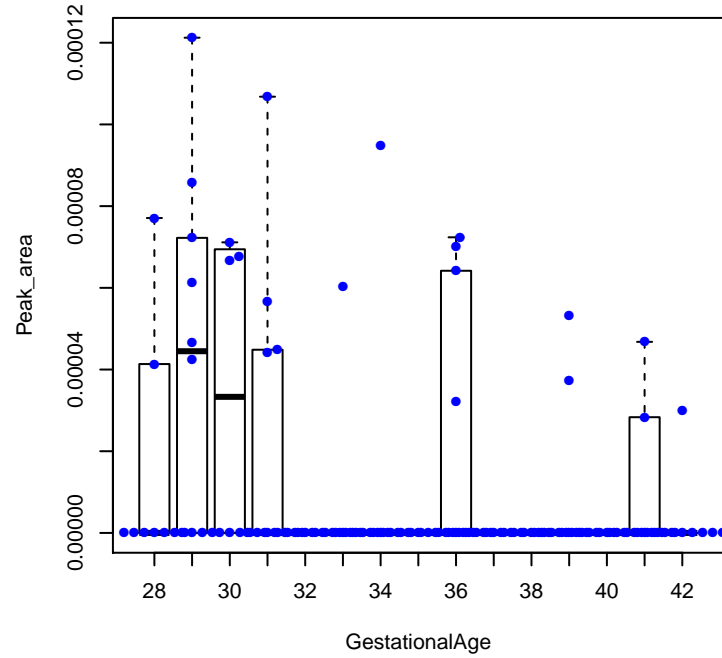

24510

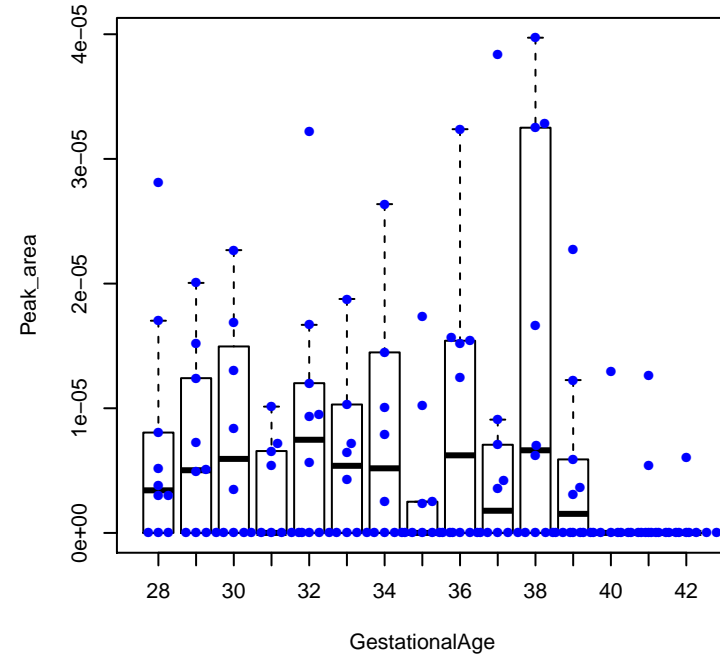

46209

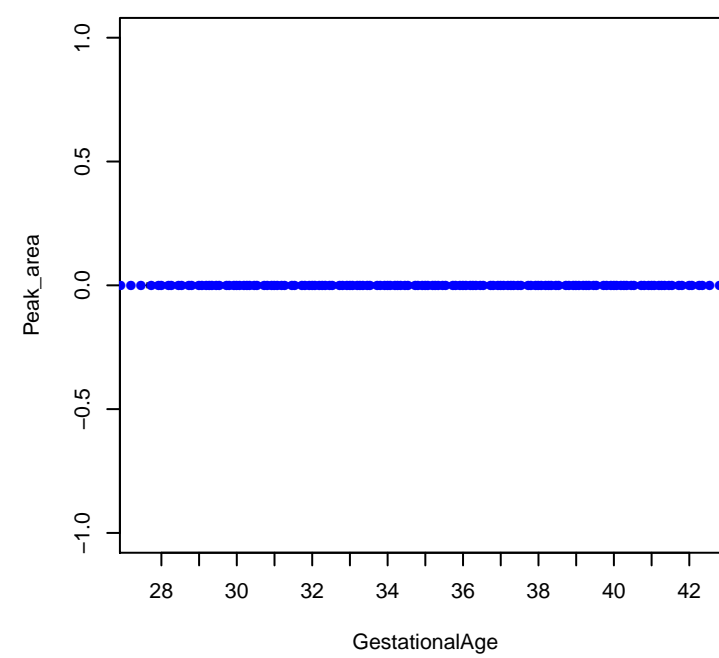

63633

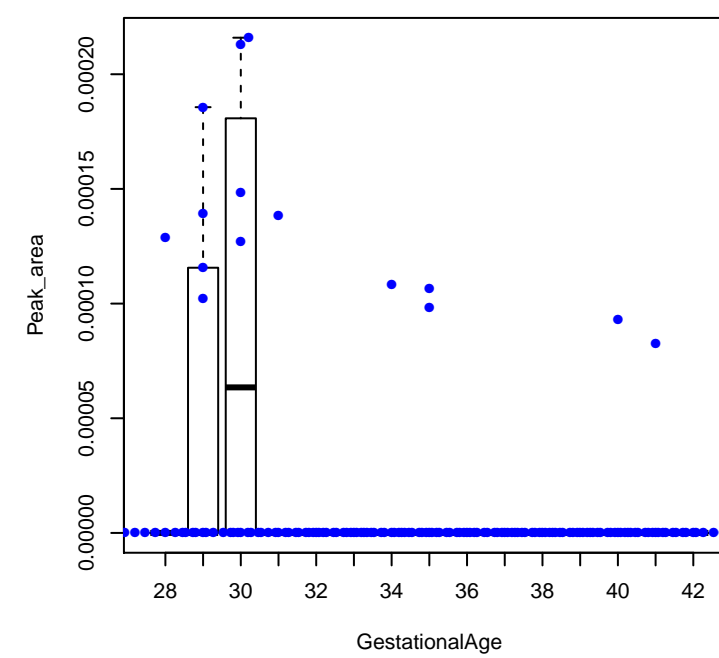

Supplement: Supplementary file [file 2020.03.27.20045534-2.pdf]
